# Supplementary material for: pYtags enable spatiotemporal measurements of receptor tyrosine kinase signaling in living cells
Source: eLife journal article supplement (doi:10.7554/elife.82863), 2023-04-25
Supplement: fig1-data1 [file 1).pdf › Figure 1 - source data 1/Figure 1 - source data 1 (blot #1).pdf]

Western blot analysis showing the expression of EGFR, pEGFR, pAkt, ppErk, and  $\beta$ -actin in WT EGFR and EGFR pYtag cells over time (0, 5, 10, 30, 60, 120 minutes) after treatment with EGF. The blots are arranged in two rows. The top row shows EGFR, pEGFR, pAkt, and ppErk. The bottom row shows  $\beta$ -actin as a loading control. Molecular weight markers (kDa) are indicated on the left of each blot. The EGFR pYtag cells show a significant increase in pEGFR, pAkt, and ppErk levels over time, while WT EGFR cells show no significant change.  $\beta$ -actin levels are consistent across all lanes, indicating equal protein loading.
