# Supplementary figures and images for: pYtags enable spatiotemporal measurements of receptor tyrosine kinase signaling in living cells
Source: eLife journal article supplement (doi:10.7554/elife.82863), 2023-04-25

WT EGFR      EGFR pYtag      WT EGFR      EGFR pYtag

ladder 0 5 10 30 60 120 0 5 10 30 60 120      ladder 0 5 10 30 60 120 0 5 10 30 60 120

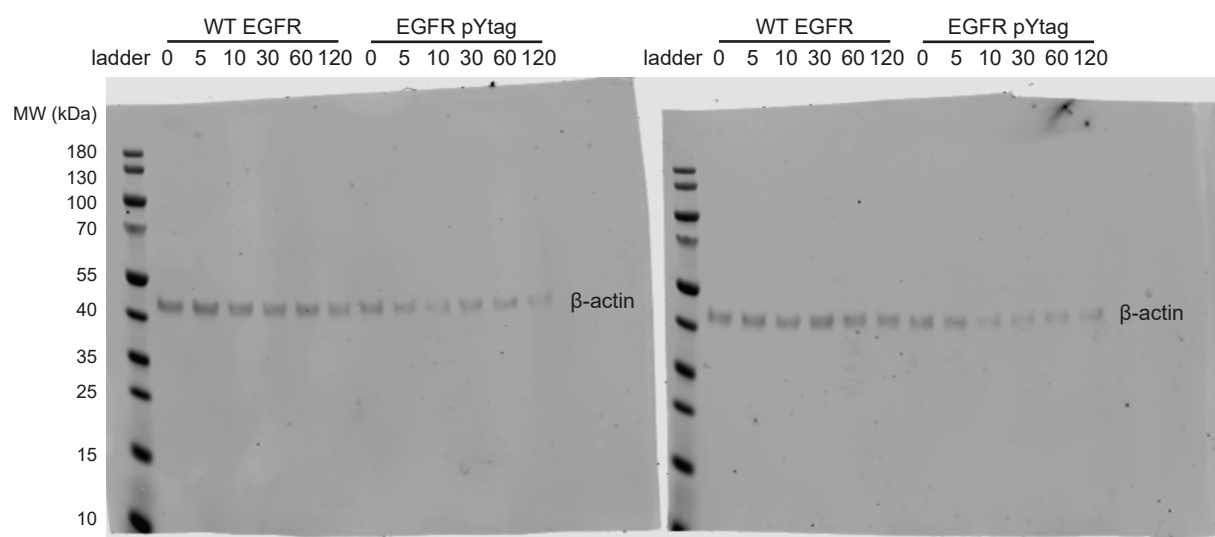

Supplement: fig1-data1 [file 2).pdf › Figure 1 - source data 1/Figure 1 - source data 1 (blot #2).pdf]

Figure 1F blot #3

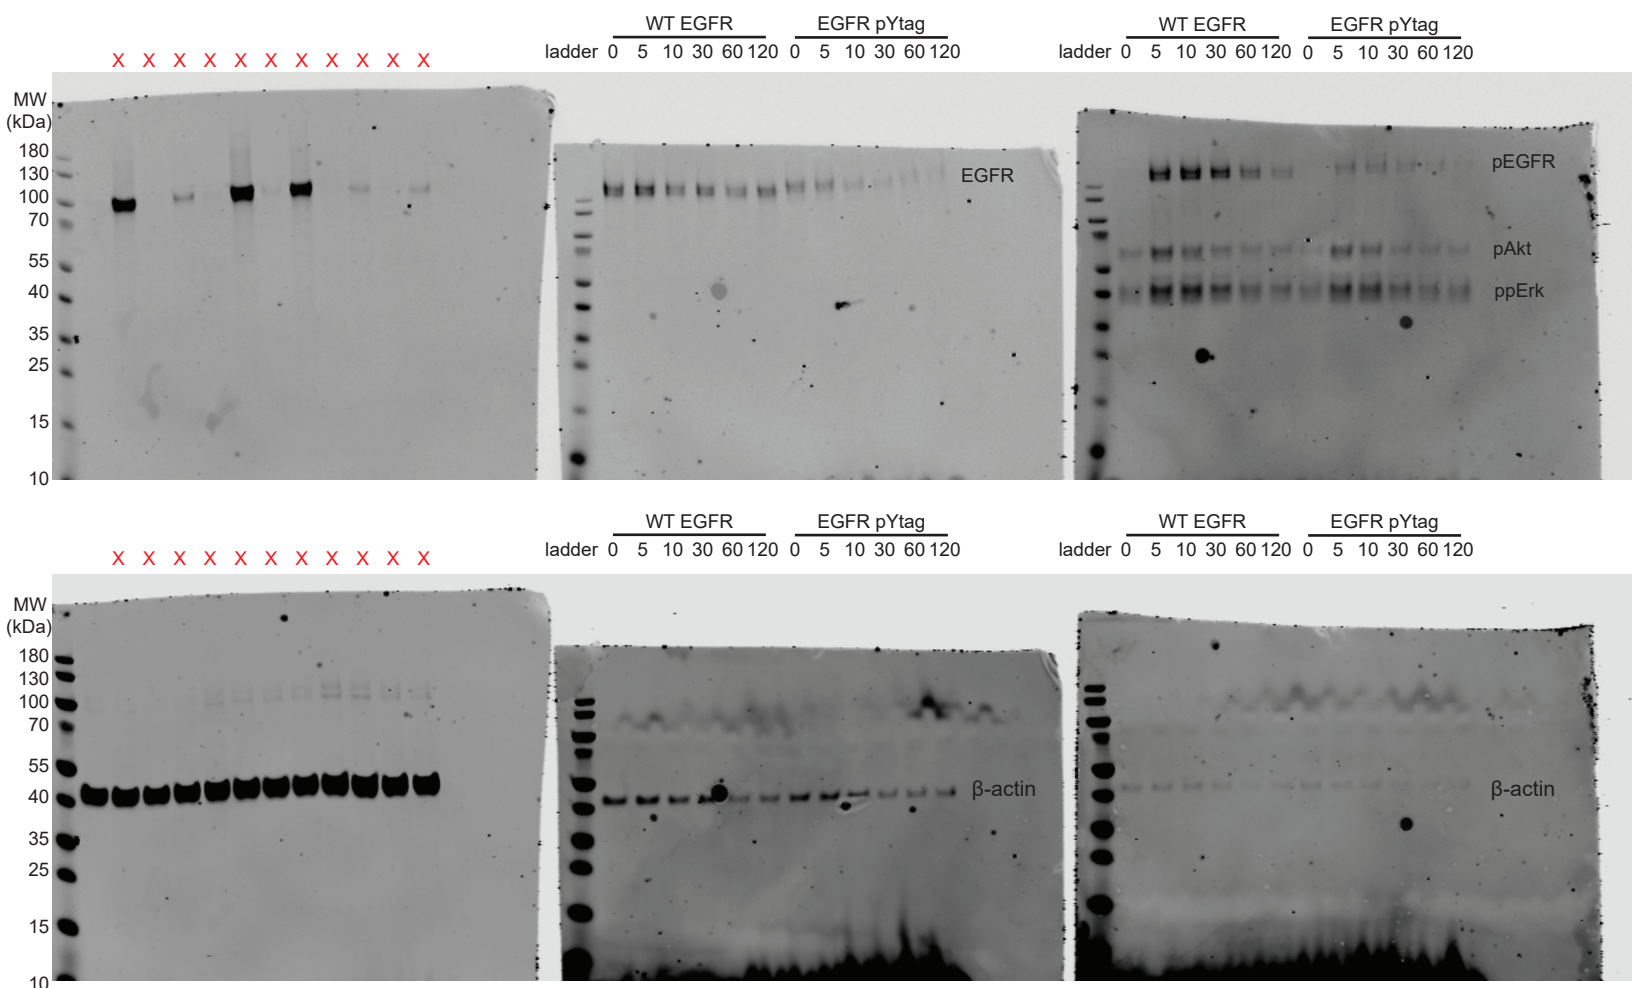

Supplement: fig1-data1 [file 3).pdf › Figure 1 - source data 1/Figure 1 - source data 1 (blot #3).pdf]

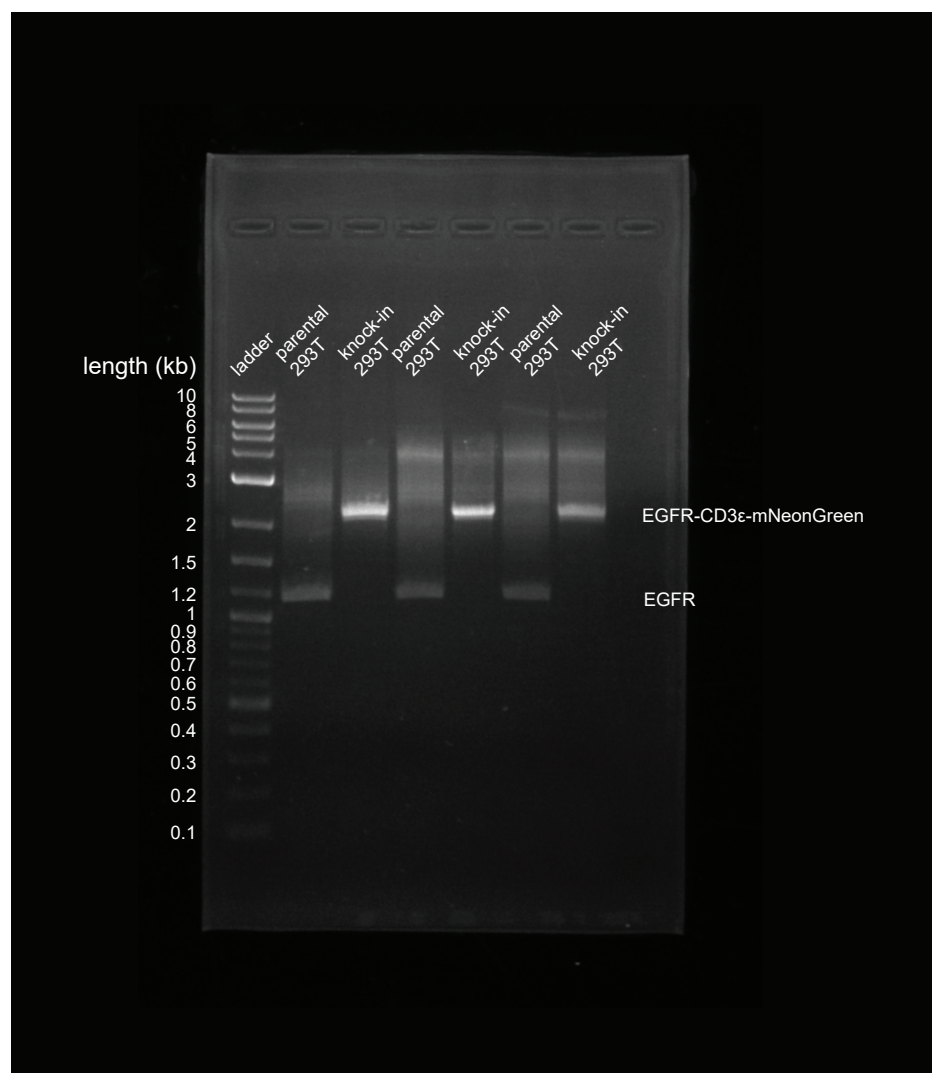

Supplement: fig6-data1 [file Figure 6 - source data 1.pdf › Figure 6 - source data 1/Figure 6 - source data 1.pdf]

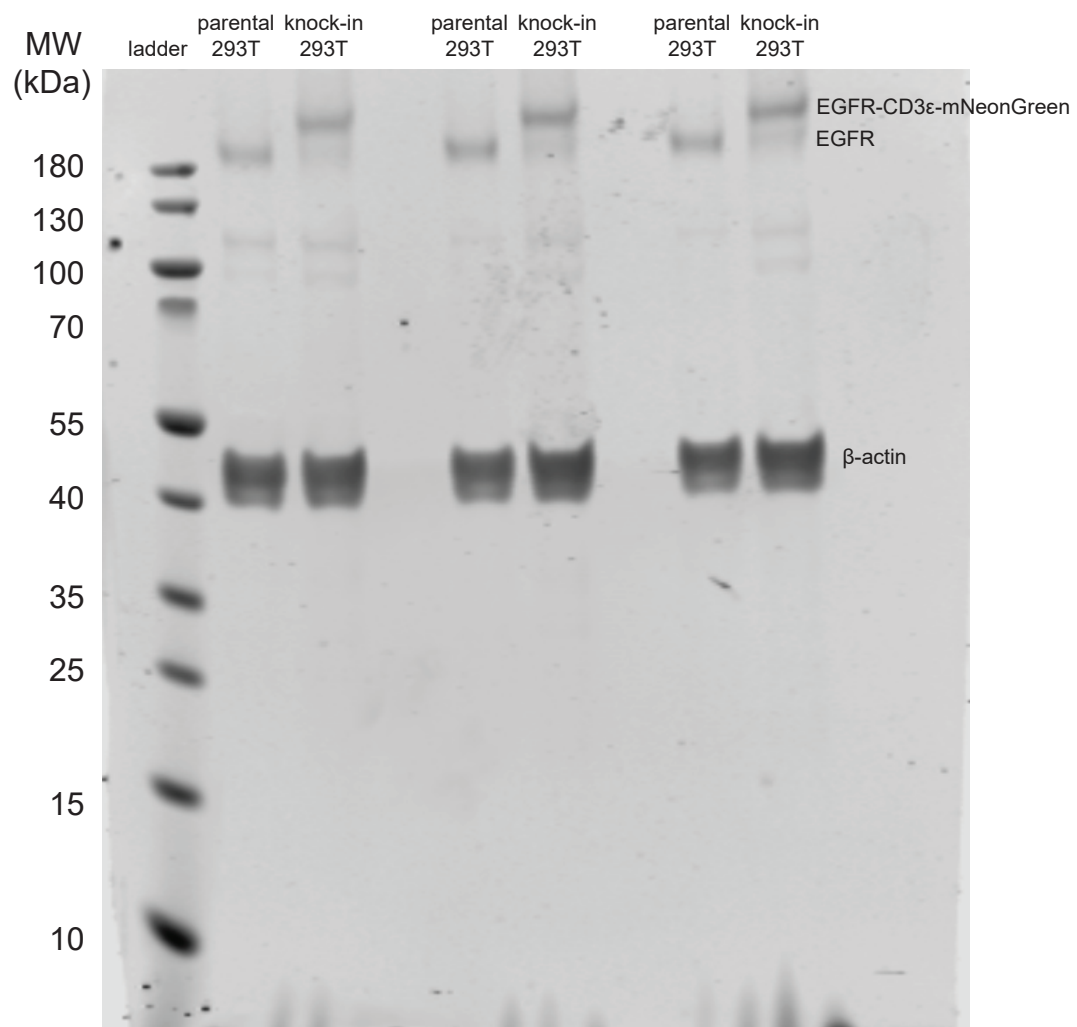

Supplement: fig6-data2 [file Figure 6 - source data 2.pdf › Figure 6 - source data 2/Figure 6 - source data 2.pdf]
